# Supplementary material for: scAAVengr, a transcriptome-based pipeline for quantitative ranking of engineered AAVs with single-cell resolution
Source: eLife. 2021 Oct 19;10:e64175. doi: 10.7554/eLife.64175 (PMC8612735; doi:10.7554/eLife.64175)
Supplement: Figure 3—source data 1. [file elife-64175-fig3-data1.csv]

	AAV1	AAV2	AAV2-4YF	AAV2-4YFTV	AAV5	AAV8	AAV8-2YF	AAV9	AAV9 2YF	AAVrh10	K91	K912	K916	K94	NHP9	NHP26	SCH NHP9/26
Rod	0.04	0.0	0.0	0.0	0.0	0.0	0.0	0.0	0.0	0.0	0.0	0.45	0.07	0.08	0.0	0.13	0.01
Cone	0.0	0.0	0.0	0.05	0.0	0.0	0.0	0.01	0.0	0.0	0.0	0.23	0.0	0.06	0.09	0.11	0.0
Horizontal Cell	0.0	0.0	0.0	0.0	0.0	0.0	0.0	0.0	0.0	0.0	0.0	1.43	0.59	0.88	0.0	0.24	0.05
Off-Bipolar	0.0	0.0	0.01	0.0	0.0	0.0	0.0	0.0	0.0	0.0	0.0	0.17	0.05	0.07	0.03	0.08	0.0
On-Bipolar	0.02	0.02	0.01	0.04	0.01	0.0	0.0	0.0	0.0	0.01	0.0	0.28	0.08	0.22	0.02	0.11	0.0
Amacrine Cell	0.05	0.04	0.02	0.07	0.0	0.02	0.0	0.0	0.0	0.02	0.0	0.72	0.46	0.34	0.09	0.34	0.02
Microglia	0.0	0.0	0.07	0.08	0.0	0.0	0.0	0.0	0.0	0.0	0.0	0.22	0.0	0.0	0.0	0.07	0.0
Muller Glia	0.05	0.13	0.13	0.25	0.0	0.01	0.0	0.0	0.0	0.01	0.02	3.36	1.26	1.27	0.25	1.31	0.05
Retinal Ganglion Cell	0.0	0.09	0.04	0.0	0.0	0.03	0.0	0.01	0.03	0.0	0.0	1.32	0.34	0.45	0.0	0.66	0.03
All Cells	0.02	0.03	0.03	0.05	0.0	0.0	0.0	0.0	0.0	0.01	0.0	0.76	0.27	0.31	0.06	0.3	0.01
