# Supplementary material for: scAAVengr, a transcriptome-based pipeline for quantitative ranking of engineered AAVs with single-cell resolution
Source: eLife. 2021 Oct 19;10:e64175. doi: 10.7554/eLife.64175 (PMC8612735; doi:10.7554/eLife.64175)
Supplement: Figure 3—source data 3. [file elife-64175-fig3-data3.csv]

	AAV1	AAV2	AAV2-4YF	AAV2-4YFTV	AAV5	AAV8	AAV8-2YF	AAV9	AAV9 2YF	AAVrh10	K91	K912	K916	K94	NHP9	NHP26	SCH NHP9/26
Rod	0.0	5.232913464344973e-06	2.009997852314691e-05	1.1186299114848827e-05	7.446136509047286e-06	0.0	0.0	0.0	0.0	0.0	3.443609542837134e-06	0.00022338668231257927	6.845095457790328e-05	0.0001915445296332096	2.779102491077378e-05	0.00011369452404828256	0.0
Cone	0.0	7.778216030437728e-05	1.101755163855654e-05	0.0	0.0	0.0	0.0	3.3216442233260223e-07	0.0	0.0	0.0	0.00019074511217980237	0.00010564929639407896	5.843787851456879e-05	3.413752154869525e-05	0.00015234555664446999	0.0
Horizontal Cell	0.0	9.80694553155144e-06	1.2069084169055405e-05	8.593273790107679e-06	0.0	6.990925423359066e-07	0.0	1.405284812579058e-06	0.0	0.0	0.0	0.0002201670103502221	0.00012281742821694747	0.00020984563656808577	9.558142057940563e-06	6.97349070556409e-05	2.123878301582115e-06
Off-Bipolar	0.0	1.1345755048377519e-05	0.0	7.1938195347054204e-06	4.165173724992087e-06	0.0	0.0	0.0	0.0	5.321400730647284e-07	0.0	0.00018367646423402288	3.206112956179655e-05	3.9625491104633096e-05	0.0	4.563757268183874e-05	0.0
On-Bipolar	1.2257629546890602e-05	0.0	7.442050756978576e-06	1.4829277254426655e-05	9.182406818283804e-06	3.1733961608453423e-06	4.68373810486516e-06	9.235002878601278e-07	2.207850478840384e-06	8.389907797160648e-07	0.0	0.0002293192635286289	0.0001233258574772312	0.0001345897796612018	8.355051210847898e-06	7.573772933526958e-05	2.467671667877262e-06
Amacrine Cell	1.0611090250155943e-05	4.338626495375347e-06	1.0321642101928189e-05	5.377903679839592e-06	0.0	3.2003263834266655e-06	3.511103800878285e-06	1.1166791075576932e-06	4.907816144710278e-06	2.693763846743289e-06	0.0	8.628101670072993e-05	5.222734109961781e-05	7.448844287525552e-05	8.091814391075385e-06	4.7736142773175666e-05	5.251043385116893e-06
Microglia	0.0	9.935671722930628e-06	0.0	4.527061347591669e-05	0.0	4.74917166441596e-06	0.0	8.234162405702429e-07	0.0	3.7597580864983537e-06	0.0	0.00010867745448927808	7.094073642749008e-06	0.00012611405331472599	2.168688541190862e-05	4.667805425957955e-05	5.5766928879782574e-06
Muller Glia	0.0	1.47097644804405e-05	1.3477767702035076e-05	1.4822672540541547e-05	2.564158593784773e-06	1.81308166897407e-06	2.516630446515457e-06	6.718802808276175e-07	0.0	1.2679502776513693e-06	8.110946708255946e-07	0.00018685239617511853	0.00010895677278495946	0.00012836556660843259	1.4235311095450946e-05	7.38261034460236e-05	3.185192704040968e-06
Retinal Ganglion Cell	0.0	4.090227527327703e-06	0.0	6.46079803740461e-06	0.0	4.679249760970566e-07	0.0	7.204196662789539e-07	1.43352858328836e-06	1.6555431894329206e-07	0.0	9.37340613923521e-05	3.7444460358901366e-05	6.355061446042914e-05	4.73292943375566e-06	3.347651356690364e-05	3.075434133499331e-06
