# Supplementary material for: scAAVengr, a transcriptome-based pipeline for quantitative ranking of engineered AAVs with single-cell resolution
Source: eLife. 2021 Oct 19;10:e64175. doi: 10.7554/eLife.64175 (PMC8612735; doi:10.7554/eLife.64175)
Supplement: Figure 3—source data 6. [file elife-64175-fig3-data6.csv]

	AAV1	AAV2	AAV2-4YF	AAV2-4YFTV	AAV5	AAV8	AAV8-2YF	AAV9	AAV9 2YF	AAVrh10	K91	K912	K916	K94	NHP9	NHP26	SCH NHP9/26
Rod	0.0	7.870958140344455e-07	6.151464475249908e-06	3.9883216506497556e-06	0.0	2.41542474604658e-07	1.2328018903595688e-06	0.0	0.0	5.644375994247795e-07	3.9479901746928304e-07	3.240386116719449e-05	1.4694426155537588e-05	2.9302987747693667e-05	1.986537214934445e-06	1.649095207337131e-05	9.298882674352488e-07
Cone	0.0	0.0	2.187538116954632e-06	0.0	0.0	0.0	0.0	0.0	0.0	9.148527462920597e-07	0.0	1.3876765530271456e-05	1.0678496983465744e-05	2.2100877965893212e-05	0.0	1.2116016578344873e-05	2.32690561978616e-07
Horizontal Cell	0.0	0.0	4.131454259653448e-06	0.0	0.0	1.296108252147717e-06	0.0	0.0	0.0	3.1434261495260867e-07	0.0	3.543574439337984e-05	1.1162811758376403e-05	1.6001631456565427e-05	0.0	9.286387074439767e-06	0.0
Off-Bipolar	0.0	6.075048670955396e-07	1.2746477847936065e-06	8.425779841681762e-07	0.0	4.62670779322902e-08	2.8003080482431786e-07	0.0	0.0	3.1114291948360205e-07	0.0	2.20814140815973e-05	1.1496670642832368e-05	1.45195172313742e-05	4.643800984417493e-07	1.1985853340029332e-05	1.312260401386539e-06
On-Bipolar	0.0	0.0	5.173707475428671e-06	1.6896735742575837e-06	0.0	4.355143992140851e-07	9.646666418160003e-07	3.4940658947690205e-08	0.0	4.5473074190498804e-07	5.951649982807547e-07	2.429337828190031e-05	1.0718746500210539e-05	2.060505560474637e-05	1.4034541661191686e-06	1.4709096429852072e-05	8.000789606459761e-07
Amacrine Cell	0.0	7.298900794524718e-07	3.94782981989771e-06	1.6172754382124698e-06	0.0	4.804888781308409e-07	6.056998365327084e-07	6.845308397193498e-08	0.0	2.112728692550469e-07	9.84224115899185e-08	1.863711886217605e-05	7.161778893780623e-06	1.846508988475126e-05	1.8969004472751439e-06	1.1267985697492184e-05	2.948993717072746e-07
Microglia	0.0	0.0	3.2031696164086485e-06	3.1960224288950364e-06	0.0	6.293419986283535e-07	7.599888100810907e-08	0.0	0.0	3.771273874328013e-07	1.698915669786204e-07	1.886594976446878e-05	1.10732084976239e-05	1.548194337903959e-05	1.455169615535923e-06	8.139465509460956e-06	4.5409990493561416e-07
Muller Glia	0.0	9.420301023837099e-07	6.376904889688179e-06	1.2955312284827308e-06	0.0	6.467108894466409e-07	1.9976181489789643e-07	0.0	0.0	4.140496310442593e-07	0.0	4.6268671889583465e-05	4.7789572449683795e-06	3.399463974742354e-05	1.2743024277345773e-06	2.4213906209758567e-05	9.96393803988773e-07
Retinal Ganglion Cell	0.0	0.0	9.240410567766307e-07	2.5951197544177404e-06	0.0	1.9394438410184462e-07	3.0201008579391443e-07	1.9344607489556098e-08	0.0	2.7587844159870175e-07	2.0407089195508225e-07	1.0163754873716479e-05	3.395614967167706e-06	9.749942131210072e-06	5.772630043255465e-07	6.164817748221236e-06	3.5827360323239533e-07
