# Supplementary material for: scAAVengr, a transcriptome-based pipeline for quantitative ranking of engineered AAVs with single-cell resolution
Source: eLife. 2021 Oct 19;10:e64175. doi: 10.7554/eLife.64175 (PMC8612735; doi:10.7554/eLife.64175)
Supplement: Figure 3—source data 8. [file elife-64175-fig3-data8.csv]

	AAV1	AAV2	AAV2-4YF	AAV2-4YFTV	AAV5	AAV8	AAV8-2YF	AAV9	AAV9 2YF	AAVrh10	K91	K912	K916	K94	NHP9	NHP26	SCH NHP9/26
Rod	0.0	0.0	0.0	0.0	0.0	0.0	0.0	0.0	0.0	0.0	0.0	2.6051378646022172e-05	0.0	0.0	0.0	1.6931230401331664e-05	0.0
Cone	0.0	0.0	0.0	0.0	0.0	0.0	0.0	0.0	0.0	0.0	0.0	0.0	0.0	0.0	0.0	2.5934200221711263e-05	0.0
Horizontal Cell	0.0	0.0	0.0	0.0	0.0	0.0	0.0	0.0	0.0	0.0	0.0	0.0	0.0	0.0	0.0	3.745956836418825e-05	0.0
Off-Bipolar	0.0	0.0	0.0	0.0	0.0	0.0	0.0	0.0	0.0	0.0	0.0	8.465630361785046e-06	1.3454440069648613e-05	0.0	0.0	2.0578605480313658e-05	0.0
On-Bipolar	0.0	0.0	0.0	0.0	0.0	0.0	0.0	0.0	0.0	0.0	0.0	2.355031058892838e-05	0.0	0.0	4.999728490340679e-06	1.0775959304256042e-05	0.0
Amacrine Cell	0.0	0.0	0.0	0.0	0.0	0.0	0.0	0.0	0.0	0.0	0.0	2.7162239291304096e-05	0.0	1.5072306383035759e-06	0.0	2.947153978060208e-05	0.0
Microglia	0.0	0.0	0.0	0.0	0.0	0.0	0.0	0.0	0.0	0.0	0.0	2.4872551902889548e-05	0.0	0.0	6.604613279864003e-06	1.9326279801434342e-05	0.0
Muller Glia	0.0	0.0	0.0	0.0	0.0	0.0	0.0	0.0	0.0	0.0	0.0	5.077654792471001e-05	0.0	0.0	0.0	8.892044304248655e-06	0.0
Retinal Ganglion Cell	0.0	0.0	0.0	0.0	0.0	0.0	0.0	0.0	0.0	0.0	0.0	0.0002243712908076149	0.0	0.0	0.0	9.48876489509633e-05	0.0
