# Supplementary material for: scAAVengr, a transcriptome-based pipeline for quantitative ranking of engineered AAVs with single-cell resolution
Source: eLife. 2021 Oct 19;10:e64175. doi: 10.7554/eLife.64175 (PMC8612735; doi:10.7554/eLife.64175)
Supplement: Figure 3—source data 10. [file elife-64175-fig3-data10.csv]

	AAV1	AAV2	AAV2-4YF	AAV2-4YFTV	AAV5	AAV8	AAV8-2YF	AAV9	AAV9 2YF	AAVrh10	K91	K912	K916	K94	NHP9	NHP26	SCH NHP9/26
Rod	6.0435256027896996e-05	0.0	0.0	0.0	0.0	0.0	0.0	0.0	0.0	0.0	0.0	0.00038097269763634733	7.73189162140342e-05	4.990681929713257e-05	0.0	0.00012705669922632648	3.541129033574998e-06
Cone	0.0	0.0	0.0	4.1590698287503205e-05	0.0	0.0	0.0	4.876148555871212e-06	0.0	0.0	0.0	0.0001797760901733238	0.0	9.336185904548444e-05	7.243577532356984e-05	6.54499857025961e-05	0.0
Horizontal Cell	0.0	0.0	0.0	0.0	0.0	0.0	0.0	0.0	0.0	0.0	0.0	0.0002642064838073306	0.00036378968574333115	0.00016471012969394413	0.0	7.69668945596748e-05	9.813839024690198e-06
Off-Bipolar	0.0	0.0	6.8208596434984234e-06	0.0	0.0	0.0	0.0	0.0	0.0	0.0	0.0	0.00023412954971680435	3.652330780948185e-05	9.293849478384582e-05	1.054667739164526e-05	0.00011839477674108422	0.0
On-Bipolar	2.2501375295645123e-05	6.051726882267637e-06	1.747811206609883e-05	2.250536226666503e-05	2.321594037936531e-05	0.0	0.0	1.57888353570662e-06	0.0	8.77363167102004e-06	0.0	0.00029027381896781144	7.017947418488669e-05	0.00023903781207939382	2.236016424761718e-05	0.00012265322369098627	1.9526983568464078e-06
Amacrine Cell	8.231025407242697e-06	2.6093610607347796e-06	1.8258018428841616e-06	2.6215818633444486e-05	0.0	3.6196054194882043e-06	0.0	0.0	0.0	6.262442994838832e-06	0.0	0.00011788979514560983	6.751299041362374e-05	6.905030162581989e-05	3.7833076205336734e-05	6.697818566902766e-05	1.6920942584265937e-06
Microglia	0.0	0.0	3.55778306282723e-05	2.050664635799485e-05	0.0	0.0	0.0	0.0	0.0	0.0	0.0	0.00021212648643764243	0.0	0.0	0.0	0.0001075023962403927	0.0
Muller Glia	8.650654323895017e-06	1.0348713140934038e-05	1.1757575476734877e-05	1.692766797536011e-05	0.0	3.5003980994900865e-07	0.0	1.2027035478171098e-07	0.0	1.2172180191475743e-06	1.2347842517061682e-06	0.00027664246290634006	8.836362899320853e-05	0.00010940022366314167	1.6202344218773522e-05	0.00011564373301807803	3.963701609190097e-06
Retinal Ganglion Cell	0.0	5.076327732210774e-06	2.3693219301046065e-06	0.0	0.0	2.2795862215437363e-06	0.0	3.1636213180800946e-07	1.027272135552055e-06	0.0	0.0	0.0002179944838035155	1.4893354838485465e-05	1.9680191041239944e-05	0.0	6.706687080080646e-05	1.730447883305405e-06
