# Supplementary material for: scAAVengr, a transcriptome-based pipeline for quantitative ranking of engineered AAVs with single-cell resolution
Source: eLife. 2021 Oct 19;10:e64175. doi: 10.7554/eLife.64175 (PMC8612735; doi:10.7554/eLife.64175)
Supplement: Figure 3—source data 11. [file elife-64175-fig3-data11.csv]

	AAV1	AAV2	AAV2-4YF	AAV2-4YFTV	AAV5	AAV8	AAV8-2YF	AAV9	AAV9 2YF	AAVrh10	K91	K912	K916	K94	NHP9	NHP26	SCH NHP9/26
Rod	0.0	0.0	3.2182051879955835e-05	0.0	0.0	0.0	0.0	0.0	0.0	0.0	0.0	0.0001604433593889443	0.0	0.00011974713435375028	0.0	2.1209231593241583e-05	0.0
Cone	0.0	1.4114761577835642e-05	0.0	1.9068207972598715e-05	0.0	0.0	0.0	0.0	0.0	0.0	2.4569723694489357e-05	8.91151279702275e-05	0.0	1.5510927967229922e-05	0.0	7.518440247832059e-05	7.028160899917806e-06
Horizontal Cell	0.0	0.0	0.0	0.0	0.0	0.0	0.0	0.0	0.0	0.0	0.0	4.874719703617042e-05	0.0	1.642518610865046e-05	0.0	0.00014772134107849627	0.0
Off-Bipolar	0.0	0.0	0.0	0.0	0.0	0.0	0.0	0.0	0.0	0.0	0.0	0.00013427577851222468	2.935127421736814e-05	1.6466428962967514e-05	0.0	3.9603771317015866e-05	0.0
On-Bipolar	0.0	0.0	0.0	0.0	0.0	0.0	0.0	0.0	0.0	0.0	0.0	8.103632436665905e-05	9.68511383589581e-05	0.00019535320751375788	0.0	5.227644303656648e-05	0.0
Amacrine Cell	0.0	0.0	2.826776754323159e-06	1.6744144752614112e-06	0.0	0.0	0.0	1.99817144215331e-07	2.9059901891695824e-06	2.3780867285290024e-06	0.0	5.011134680624991e-05	5.3357634606365874e-05	6.975302410708506e-05	2.0110596208159935e-05	5.833240007934699e-05	1.6857157516178054e-06
Microglia	0.0	0.0	0.0	0.0	0.0	0.0	0.0	0.0	0.0	0.0	0.0	0.00013095059093508796	0.0	1.888016032642119e-05	0.0	0.0	0.0
Muller Glia	1.0225376665925007e-05	1.3793423182940082e-05	6.785407220332256e-06	2.0089061662444865e-05	0.0	0.0	0.0	0.0	8.32273672505139e-07	0.0	0.0	0.0001947069891910403	7.360087129422729e-05	7.878415403406499e-05	9.622992458047964e-06	9.845403250075537e-05	1.650510117163211e-06
Retinal Ganglion Cell	7.657928419954225e-07	8.144120735751628e-07	3.7391679077233285e-07	1.9804516066699765e-07	2.8009089330275395e-07	2.482888919529291e-07	1.5425126542061343e-07	0.0	0.0	1.0167041764254702e-07	3.7208480842928307e-06	0.00020645413316240034	2.2108507082034574e-05	0.00016784157920972208	1.6998271374485992e-05	2.0894496324894676e-05	1.3232677639760654e-06
