# Supplementary material for: scAAVengr, a transcriptome-based pipeline for quantitative ranking of engineered AAVs with single-cell resolution
Source: eLife. 2021 Oct 19;10:e64175. doi: 10.7554/eLife.64175 (PMC8612735; doi:10.7554/eLife.64175)
Supplement: Figure 3—source data 14. [file elife-64175-fig3-data14.csv]

	AAV1	AAV2	AAV2-4YF	AAV2-4YFTV	AAV5	AAV8	AAV8-2YF	AAV9	AAV9 2YF	AAVrh10	K91	K912	K916	K94	NHP9	NHP26	SCH NHP9/26
Rod	0.0	0.0	2.138898488448118e-06	1.520596713276382e-06	0.0	7.021687052423812e-07	0.0	4.3154469475069246e-08	0.0	1.1079695654925916e-06	0.0	4.787863845076819e-05	1.8966734717148202e-05	6.57628915358664e-05	0.0	1.3818250218922031e-05	6.080768089963954e-06
Cone	0.0	0.0	2.821451322998452e-06	3.116269526060895e-06	0.0	8.729481768527854e-07	0.0	4.067790713749654e-07	0.0	2.6029067977406122e-06	0.0	4.27477717226049e-05	1.2793683673352952e-05	3.3449719173889065e-05	0.0	1.4374713711824822e-05	2.2715052240805398e-06
Horizontal Cell	0.0	0.0	1.555208325588858e-06	3.701244511389113e-06	0.0	0.0	0.0	0.0	0.0	0.0	0.0	5.555970878531415e-05	1.6958968386739954e-05	4.640380713443488e-05	0.0	1.384121865248257e-05	1.939493645813458e-06
Off-Bipolar	0.0	0.0	3.4774207767897476e-06	3.0113121978487617e-06	0.0	4.2874634568727745e-07	0.0	5.232862803342837e-08	0.0	7.609188954362793e-07	0.0	5.6813687358912985e-05	2.093698301993603e-05	5.9854747308229425e-05	0.0	1.0771354628551243e-05	4.656532631511124e-06
On-Bipolar	0.0	0.0	1.4069819611485701e-06	5.193352501121833e-06	0.0	4.776428663723115e-07	0.0	1.570499932423721e-07	0.0	1.5108092303178887e-06	0.0	5.20841074414367e-05	1.8157992013274778e-05	6.019107337202065e-05	0.0	1.2803463762464064e-05	4.770528328447545e-06
Amacrine Cell	0.0	0.0	4.034218556058966e-06	5.204211198475162e-06	0.0	3.6750489889800713e-07	0.0	2.969198979425862e-07	0.0	1.471779284505693e-06	0.0	3.689895154513195e-05	1.420172773789639e-05	4.449183533888532e-05	1.6121678784654151e-06	1.2430829673657267e-05	2.6358590196634823e-06
Microglia	0.0	0.0	0.0	2.4165084627574356e-06	0.0	0.0	0.0	0.0	0.0	0.0	0.0	3.835344249145544e-05	0.0	2.5209032980914127e-05	0.0	1.0306696713598109e-05	1.4896389793412301e-06
Muller Glia	0.0	0.0	5.41658184611205e-06	4.382779018397454e-06	0.0	2.219738167623991e-07	0.0	5.480157828107456e-07	0.0	1.304772168454304e-06	0.0	4.529589459151836e-05	2.4867889739133438e-05	5.539851985633621e-05	0.0	8.952306772885088e-06	3.8347316226812386e-06
Retinal Ganglion Cell	0.0	0.0	2.9659480814312385e-06	7.388826774363758e-07	0.0	8.003608623461474e-08	0.0	6.130358410500304e-08	2.236436183577566e-07	5.030053744079573e-07	0.0	2.7233904011530078e-05	1.3536253053963645e-05	2.374307692460349e-05	0.0	6.855873561399802e-06	3.0337714677304673e-06
