# Supplementary material for: scAAVengr, a transcriptome-based pipeline for quantitative ranking of engineered AAVs with single-cell resolution
Source: eLife. 2021 Oct 19;10:e64175. doi: 10.7554/eLife.64175 (PMC8612735; doi:10.7554/eLife.64175)
Supplement: Figure 3—source data 15. [file elife-64175-fig3-data15.csv]

	AAV1	AAV2	AAV2-4YF	AAV2-4YFTV	AAV5	AAV8	AAV8-2YF	AAV9	AAV9 2YF	AAVrh10	K91	K912	K916	K94	NHP9	NHP26	SCH NHP9/26
Rod	8.682609919313344e-07	2.871343027355343e-06	2.8256030142452997e-06	5.36545207619954e-06	0.0	1.2504123741335375e-07	7.360535286567918e-07	4.552140474007725e-08	0.0	4.2144520297909133e-07	0.0	3.3896987499877085e-05	9.994597076042076e-07	7.937416734331534e-06	7.181012401954714e-07	2.1109184769096704e-05	3.0049667288323304e-07
Cone	0.0	2.8553452630262004e-06	2.6158092266518366e-06	1.2974855735975434e-05	0.0	1.4801551158837507e-07	3.383930777241137e-07	0.0	0.0	9.583244825124792e-07	0.0	6.039814189532323e-05	9.150295996944586e-06	1.0147104126979708e-05	0.0	3.106513385109093e-05	2.839518647510964e-07
Horizontal Cell	0.0	5.579474916940132e-06	3.0725926809197843e-06	1.1148545649160831e-06	0.0	0.0	0.0	0.0	0.0	2.0054128591513855e-07	0.0	3.038781464634202e-05	8.675967536976106e-06	1.561957122665075e-05	4.819682866034783e-06	2.048234688462922e-05	0.0
Off-Bipolar	0.0	7.032651599366894e-07	1.9564486323793956e-06	3.307546518229367e-06	0.0	2.5861013868247523e-07	0.0	4.1884158344815635e-08	0.0	5.313340717282569e-07	0.0	3.241534744006664e-05	6.274138522537933e-06	1.2153587609044654e-05	0.0	2.268449743750456e-05	1.6838811237911863e-07
On-Bipolar	5.816705196611437e-07	4.152182121204312e-07	3.4570978173158983e-06	3.4468941906615563e-06	0.0	1.1487811936610974e-07	0.0	0.0	0.0	6.265004455122247e-07	1.3230028068499821e-07	2.9854640335359263e-05	3.6812609238257204e-06	1.2098795640574257e-05	1.0113863500006065e-06	1.869671195198113e-05	1.4511156512507187e-07
Amacrine Cell	8.132038296146692e-07	7.143789995346784e-07	1.0525812971726276e-06	1.8766900853844283e-06	0.0	1.1678557251802676e-07	5.394525551583499e-08	2.4836335741162927e-08	0.0	3.9311528221925104e-07	0.0	2.3854828418138086e-05	5.482610849130349e-06	6.77746797583749e-06	1.9242156184586062e-07	1.6368625876390407e-05	2.9236346464565565e-07
Microglia	0.0	0.0	3.7753216090499856e-06	2.207897579322416e-06	0.0	0.0	0.0	0.0	0.0	3.1601556004818663e-07	0.0	2.121600208171571e-05	6.777070999737733e-06	9.4808622486133e-06	0.0	1.6033350485100537e-05	0.0
Muller Glia	0.0	1.2338583098639935e-06	4.9303977082906255e-06	7.156066587633124e-06	0.0	3.229703436929982e-07	2.186791486151067e-07	4.522983231660452e-08	0.0	5.206626459433319e-07	0.0	4.461713381944265e-05	7.937348216456743e-06	2.0472465703837943e-05	0.0	2.1035512361803454e-05	3.777119637855115e-07
Retinal Ganglion Cell	4.801260253038954e-07	0.0	0.0	1.322947302768473e-06	0.0	0.0	1.3557598925788856e-07	0.0	0.0	1.232965261383581e-06	0.0	1.7557532893054124e-05	1.5787064376424535e-06	2.5571489089870043e-06	0.0	1.1438019885664456e-05	1.6026226212190785e-07
