# Supplementary material for: scAAVengr, a transcriptome-based pipeline for quantitative ranking of engineered AAVs with single-cell resolution
Source: eLife. 2021 Oct 19;10:e64175. doi: 10.7554/eLife.64175 (PMC8612735; doi:10.7554/eLife.64175)
Supplement: Figure 3—source data 16. [file elife-64175-fig3-data16.csv]

	AAV1	AAV2	AAV2-4YF	AAV2-4YFTV	AAV5	AAV8	AAV8-2YF	AAV9	AAV9 2YF	AAVrh10	K91	K912	K916	K94	NHP9	NHP26	SCH NHP9/26
Rod	0.0	0.0	0.0	0.0	0.0	0.0	0.0	0.0	0.0	0.0	0.0	4.748866256776863e-05	1.531452161984688e-05	7.425851794298493e-06	0.0	1.1659518241958939e-05	0.0
Cone	0.0	0.0	0.0	0.0	0.0	0.0	0.0	0.0	0.0	0.0	0.0	4.845469659192337e-05	0.0	0.0	0.0	0.0	0.0
Horizontal Cell	0.0	0.0	0.0	0.0	0.0	0.0	0.0	0.0	0.0	0.0	0.0	2.2302511262768186e-05	0.0	1.4489404725875606e-05	0.0	0.00010715041124867474	0.0
Off-Bipolar	0.0	0.0	0.0	0.0	0.0	0.0	0.0	0.0	0.0	0.0	0.0	0.0	0.0	0.0	0.0	3.731729259828325e-05	0.0
On-Bipolar	0.0	0.0	0.0	0.0	0.0	0.0	0.0	0.0	0.0	0.0	0.0	2.3952218142219092e-05	4.653765101954239e-06	1.7768484114927545e-05	0.0	1.2907515037268722e-05	0.0
Amacrine Cell	0.0	0.0	0.0	0.0	0.0	0.0	0.0	0.0	0.0	0.0	0.0	4.6608460994693514e-05	0.0	1.6515398115409292e-05	0.0	8.077998319073744e-06	0.0
Microglia	0.0	0.0	0.0	0.0	0.0	0.0	0.0	0.0	0.0	0.0	0.0	7.207207207207208e-06	0.0	0.0	0.0	2.07106302294109e-05	0.0
Muller Glia	0.0	0.0	0.0	0.0	0.0	0.0	0.0	0.0	0.0	0.0	0.0	2.2484072323900283e-05	2.9136122988918294e-06	0.0	0.0	9.973724049111233e-06	0.0
Retinal Ganglion Cell	0.0	0.0	0.0	0.0	0.0	0.0	0.0	0.0	0.0	0.0	0.0	2.391613959414551e-05	8.652292459896248e-07	3.6599792555491056e-06	0.0	4.089115796263516e-06	0.0
