# Supplementary material for: scAAVengr, a transcriptome-based pipeline for quantitative ranking of engineered AAVs with single-cell resolution
Source: eLife. 2021 Oct 19;10:e64175. doi: 10.7554/eLife.64175 (PMC8612735; doi:10.7554/eLife.64175)
Supplement: Figure 8—source data 2. [file elife-64175-fig8-data2.csv]

	SCH NHP9/26	NHP9	NHP26	K94	K916	K912	K91	AAVrh10	AAV9 2YF	AAV9	AAV8-2YF	AAV8	AAV5	AAV2-4YF-T491V	AAV2-4YF	AAV2	AAV1
Astrocyte	3.78	0.0	0.0	0.0	0.0	0.0	0.0	2.71	6.31	6.4	6.8	4.76	0.0	0.0	0.0	0.0	0.0
Chorid plexus epithelial cells	24.72	0.0	0.0	0.24	0.0	0.0	0.0	15.36	11.02	7.77	16.07	18.73	0.98	0.0	0.0	0.0	0.64
Endothelial Cell	5.62	0.0	0.0	0.0	0.0	0.0	0.0	5.36	10.22	3.45	4.49	16.95	0.0	0.0	0.0	0.0	0.0
Microglia	1.18	0.0	0.0	0.0	0.0	0.0	0.0	2.81	0.36	0.73	3.3	3.56	0.0	0.0	0.0	0.0	0.0
Neuron	3.82	0.0	0.0	0.0	0.0	0.0	0.0	7.29	6.95	4.7	12.21	3.84	0.0	0.0	0.0	0.0	0.0
Oligodendrocyte	3.75	0.0	0.0	0.0	0.0	0.0	0.0	0.0	0.0	0.0	2.99	3.77	0.0	0.0	0.0	0.0	0.0
All Cells	18.05	0.0	0.0	0.17	0.0	0.0	0.0	11.58	8.53	6.19	12.69	14.62	0.68	0.0	0.0	0.0	0.67
