# Supplementary material for: scAAVengr, a transcriptome-based pipeline for quantitative ranking of engineered AAVs with single-cell resolution
Source: eLife. 2021 Oct 19;10:e64175. doi: 10.7554/eLife.64175 (PMC8612735; doi:10.7554/eLife.64175)
Supplement: Figure 8—source data 7. [file elife-64175-fig8-data7.csv]

	SCH NHP9/26	NHP26	NHP9	K94	K916	K912	K91	AAVrh10	AAV9 2YF	AAV9	AAV8-2YF	AAV8	AAV5	AAV2-4YF-T491V	AAV2-4YF	AAV2	AAV1
Astrocyte	5.971487727898371e-05	0.0	0.0	0.0	0.0	0.0	0.0	5.623492155589363e-05	0.0001285390671659158	6.164626903243638e-05	0.00011063704092870702	0.0001475432308651092	0.0	0.0	0.0	0.0	0.0
Chorid plexus epithelial cells	0.0001766210135568243	0.0	0.0	0.0	0.0	0.0	0.0	0.00016200212568969456	0.00011378155620693496	6.375857783485373e-05	0.00016129188796712814	0.00018837031233341191	0.0	0.0	0.0	0.0	9.797070876228587e-06
Endothelial Cell	0.000288741857509282	0.0	0.0	0.0	0.0	0.0	0.0	0.0002018589593883409	0.0001740266110035649	3.672887337908718e-05	9.433821290865535e-05	0.00015370818901307932	0.0	0.0	0.0	0.0	3.74251842983138e-05
Erythrocyte	2.7349231902152502e-05	0.0	0.0	0.0	0.0	0.0	0.0	1.2803797566020847e-05	2.4359678331786773e-05	2.865695678758079e-05	9.473632715583166e-06	9.119776520075103e-05	0.0	0.0	0.0	0.0	0.0
Microglia	5.342649304848821e-05	0.0	0.0	0.0	0.0	0.0	0.0	8.783517288501387e-05	1.3975837405759348e-05	1.4007952264695811e-05	8.014737547258751e-05	0.0001146100331244513	1.5636923262403064e-05	0.0	0.0	0.0	0.0
Neuron	6.794844651031832e-05	0.0	0.0	0.0	0.0	0.0	0.0	3.620174731805778e-05	3.3855520882603414e-05	1.0754846160103256e-05	5.450496320972115e-05	7.777035266258693e-05	0.0	0.0	0.0	0.0	0.0
Oligodendrocyte	2.8724104210153156e-05	0.0	0.0	0.0	0.0	0.0	0.0	7.782541861910215e-06	1.7988871006617262e-05	1.1843250126699902e-05	1.6207168946714785e-05	1.6133702962937412e-05	0.0	0.0	0.0	0.0	0.0
Oligodendrocyte precursor	2.5955640064838507e-05	0.0	0.0	0.0	0.0	0.0	0.0	2.2737509116687467e-05	3.5959931519815554e-05	4.93399196930737e-06	3.2189439910546656e-05	3.535037646135524e-05	0.0	0.0	0.0	0.0	7.618040515899431e-06
Pericyte	7.376573874338401e-05	0.0	0.0	0.0	0.0	0.0	0.0	0.00046014350890835154	0.00013420066399011737	5.588096295124399e-05	0.00011781331234550497	7.417221590423189e-05	0.0	0.0	0.0	0.0	9.020127965572269e-05
