# Supplementary material for: scAAVengr, a transcriptome-based pipeline for quantitative ranking of engineered AAVs with single-cell resolution
Source: eLife. 2021 Oct 19;10:e64175. doi: 10.7554/eLife.64175 (PMC8612735; doi:10.7554/eLife.64175)
Supplement: Figure 8—source data 8. [file elife-64175-fig8-data8.csv]

	SCH NHP9/26	NHP26	NHP9	K94	K916	K912	K91	AAVrh10	AAV9 2YF	AAV9	AAV8-2YF	AAV8	AAV5	AAV2-4YF-T491V	AAV2-4YF	AAV2	AAV1
Astrocyte	4.7173099988737536e-05	0.0	0.0	0.0	0.0	0.0	0.0	3.398848069420612e-05	5.7805644843391385e-05	5.7217584847204883e-05	6.391236435129242e-05	2.221458897336301e-05	0.0	0.0	0.0	0.0	0.0
Chorid plexus epithelial cells	0.00011707951512265088	0.0	0.0	2.4875045940241024e-07	0.0	0.0	0.0	9.65790772599928e-05	6.310687716197398e-05	5.192777270013426e-05	7.377912907120183e-05	9.06052894578149e-05	4.854047418666712e-06	0.0	0.0	0.0	9.604550789660637e-06
Endothelial Cell	7.402071578974484e-05	0.0	0.0	0.0	0.0	0.0	0.0	7.276823672274251e-05	0.00011111030096403571	3.5001430360859285e-06	0.00021936716812808805	0.00017552586589863144	0.0	0.0	0.0	0.0	0.0
Microglia	2.2267987079526438e-05	0.0	0.0	0.0	0.0	0.0	0.0	7.113647576211733e-05	1.880485936658163e-06	2.1573283926498596e-05	7.108710265832138e-05	7.11304600329476e-05	0.0	0.0	0.0	0.0	0.0
Neuron	1.2459964086562624e-06	0.0	0.0	0.0	0.0	0.0	0.0	9.856088758373941e-05	5.374415644717093e-05	5.442463454733393e-05	0.0002835555199992806	9.661372156600909e-06	0.0	0.0	0.0	0.0	0.0
Oligodendrocyte	2.8996262616772274e-06	0.0	0.0	0.0	0.0	0.0	0.0	0.0	0.0	0.0	7.617065015464545e-06	4.21029493936969e-06	0.0	0.0	0.0	0.0	0.0
Pericyte	0.0002582758023908709	0.0	0.0	0.0	0.0	0.0	0.0	1.055243054934116e-05	0.0	0.0	0.00022757802837766717	0.000107343589828527	0.0	0.0	0.0	0.0	2.568119978087135e-05
