# Supplementary material for: scAAVengr, a transcriptome-based pipeline for quantitative ranking of engineered AAVs with single-cell resolution
Source: eLife. 2021 Oct 19;10:e64175. doi: 10.7554/eLife.64175 (PMC8612735; doi:10.7554/eLife.64175)
Supplement: Figure 8—source data 9. [file elife-64175-fig8-data9.csv]

	SCH NHP9/26	NHP26	NHP9	K94	K916	K912	K91	AAVrh10	AAV9 2YF	AAV9	AAV8-2YF	AAV8	AAV5	AAV2-4YF-T491V	AAV2-4YF	AAV2	AAV1
Cardiac Muscle Cell	0.0001513967341914902	0.0	0.0	0.0	0.0	0.0	0.0	0.00032137237538362766	0.00023710147181049053	0.0002831452049107277	0.0007536725963866468	0.00043979654844576873	0.0	0.0	0.0	0.0	0.0
Endocardial Cell	1.4526988566938708e-05	0.0	0.0	0.0	0.0	0.0	0.0	1.1379419381862304e-05	7.170150939355525e-06	1.301596653403314e-05	0.00010130983621770827	7.773158419413288e-05	0.0	0.0	0.0	0.0	0.0
Fibroblast	9.622771484543146e-05	0.0	0.0	0.0	0.0	0.0	0.0	0.0001068943791929484	4.370995639196066e-05	7.71973638749845e-05	0.00010200335514597763	2.4449053939197583e-05	0.0	0.0	0.0	0.0	0.0
Leukocyte	0.0	0.0	0.0	0.0	0.0	0.0	0.0	5.379983125545343e-05	5.7088284560055186e-05	6.933183813989783e-05	0.0	8.864221673102734e-05	0.0	0.0	0.0	0.0	0.0
Smooth Muscle Cell	0.0	0.0	0.0	0.0	0.0	0.0	0.0	0.0	1.6933276829553427e-05	0.0	2.229831104598697e-05	8.258928304604638e-05	0.0	0.0	0.0	0.0	0.0
