# Supplementary material for: scAAVengr, a transcriptome-based pipeline for quantitative ranking of engineered AAVs with single-cell resolution
Source: eLife. 2021 Oct 19;10:e64175. doi: 10.7554/eLife.64175 (PMC8612735; doi:10.7554/eLife.64175)
Supplement: Figure 8—source data 10. [file elife-64175-fig8-data10.csv]

	SCH NHP9/26	NHP26	NHP9	K94	K916	K912	K91	AAVrh10	AAV9 2YF	AAV9	AAV8-2YF	AAV8	AAV5	AAV2-4YF-T491V	AAV2-4YF	AAV2	AAV1
Cardiac Muscle Cell	0.0024118345810837096	0.0	0.0	3.0009405001294303e-06	0.0	0.0	0.0	0.0035058312594806454	0.0013303712703198022	0.0012565457811113806	0.002685330028461912	0.0027358670178501995	0.0	0.0	0.0	0.0	6.318201962549987e-05
Endocardial Cell	8.84038892956025e-05	0.0	0.0	0.0	0.0	0.0	0.0	0.00018285020339070415	8.459118063523407e-05	5.8758669992437664e-05	0.00010919193133153977	0.0001621970072970921	0.0	0.0	0.0	0.0	9.558269342760016e-05
Endothelial Cell	7.555744755306914e-05	0.0	0.0	0.0	0.0	0.0	0.0	8.334640386262375e-05	4.253683164168318e-05	4.210661249461316e-05	5.402310238399989e-05	6.170569436717927e-05	0.0	0.0	0.0	0.0	2.817772395135661e-06
Fibroblast	3.395341837084648e-05	0.0	2.6441733569330343e-06	0.0	0.0	0.0	0.0	9.07864740690449e-05	4.4224806262018245e-05	4.087494680860266e-05	6.786953051263631e-05	8.785351549573678e-05	1.2678389762140124e-05	1.8457114535568508e-07	0.0	1.9289156059319152e-07	8.867190222223229e-06
Leukocyte	8.220500344745699e-05	0.0	0.0	0.0	0.0	0.0	0.0	0.00015417529161491653	4.626570613104234e-05	5.735960345777452e-05	0.00010743152324933104	0.00010110808905711325	9.033878664272729e-06	0.0	0.0	0.0	1.6867397214419135e-06
Smooth Muscle Cell	1.72804040687453e-05	0.0	0.0	0.0	0.0	0.0	0.0	1.1899321723559412e-05	2.7875686010523825e-05	2.4351185654099788e-05	4.7038279069431395e-05	5.9492606559866996e-05	0.0	0.0	0.0	0.0	0.0
