# Supplementary material for: scAAVengr, a transcriptome-based pipeline for quantitative ranking of engineered AAVs with single-cell resolution
Source: eLife. 2021 Oct 19;10:e64175. doi: 10.7554/eLife.64175 (PMC8612735; doi:10.7554/eLife.64175)
Supplement: Figure 8—source data 11. [file elife-64175-fig8-data11.csv]

	SCH NHP9/26	NHP26	NHP9	K94	K916	K912	K91	AAVrh10	AAV9 2YF	AAV9	AAV8-2YF	AAV8	AAV5	AAV2-4YF-T491V	AAV2-4YF	AAV2	AAV1
Hepatocyte	4.91064584965317e-05	0.0	0.0	0.0	0.0	0.0	0.0	9.867878512647843e-05	0.0001454848151791482	3.924462298941707e-05	5.463556294689792e-05	8.755220351908364e-05	0.0	0.0	0.0	0.0	1.1489427003292984e-05
Kuppfer cell	4.733440379517092e-05	0.0	0.0	0.0	0.0	0.0	0.0	3.7004558681858785e-05	8.452817746497037e-05	3.0509499702182802e-05	6.429537914796469e-05	6.287634258498357e-05	0.0	0.0	0.0	0.0	2.5380332168375787e-05
B cell	2.4173197315943844e-05	0.0	0.0	0.0	0.0	0.0	0.0	1.7607181657524505e-05	4.135465652008302e-05	3.0675977816473474e-06	3.071460371177525e-05	1.1406232669923198e-05	0.0	0.0	0.0	0.0	0.0
Endothelial cell	7.781595505956752e-06	0.0	0.0	0.0	0.0	0.0	0.0	1.9326787900160077e-05	1.9502287745988716e-05	1.023892383311038e-05	1.2196258676885321e-05	0.00010091250268277514	3.5320385592797486e-05	0.0	0.0	0.0	2.1083536198401524e-05
