# Supplementary material for: scAAVengr, a transcriptome-based pipeline for quantitative ranking of engineered AAVs with single-cell resolution
Source: eLife. 2021 Oct 19;10:e64175. doi: 10.7554/eLife.64175 (PMC8612735; doi:10.7554/eLife.64175)
Supplement: Figure 8—source data 12. [file elife-64175-fig8-data12.csv]

	SCH NHP9/26	NHP26	NHP9	K94	K916	K912	K91	AAVrh10	AAV9 2YF	AAV9	AAV8-2YF	AAV8	AAV5	AAV2-4YF-T491V	AAV2-4YF	AAV2	AAV1
Hepatocyte	0.000370308007036153	0.0	1.192458884022526e-05	5.7505509721673424e-06	0.0	3.7275524317112803e-06	0.0	0.0004941032747618287	0.0006394035123416099	0.0005214926120236028	0.0007276347645728035	0.0008997842574538004	0.00028449641670008586	0.0	0.0	0.0	0.00030726258014251
Kuppfer cell	7.145003278570243e-05	0.0	2.5799720319129025e-05	0.0	0.0	5.883849204571441e-07	0.0	0.00016190549072361138	2.6407770640844226e-05	2.625303466730368e-05	0.00012380797357676467	0.00022689714228230973	0.0	0.0	0.0	0.0	4.997295649268113e-05
B cell	1.8578938019257392e-05	0.0	0.0	0.0	0.0	0.0	0.0	3.4483884447511474e-05	1.7400536644695877e-05	1.7575922007029055e-05	4.8619207571925295e-05	8.8084640862709e-05	0.0	0.0	0.0	0.0	0.0
Endothelial cell	1.8124370551757347e-05	0.0	0.0	0.0	0.0	6.263617412668484e-07	0.0	0.00021684201351850597	1.8190685250633702e-05	7.072746528505182e-05	0.00010412696026328169	0.00045394594287947033	5.4379382477019236e-05	0.0	0.0	0.0	0.00021279301093475806
Natural Killer Cell	0.0005953492350023383	0.0	0.0	0.0	0.0	0.0	0.0	0.0	2.143027814765498e-05	1.583387255696847e-05	1.3894212754033549e-05	1.902484435186176e-05	0.0	0.0	0.0	0.0	0.0
